## Which Vasopressor Should Be Used To Treat Hypotension during Magnesium Sulfate Infusion and Epidural Anesthesia?

Susan L. Sipes, M.D.,\* David H. Chestnut, M.D.,† Robert D. Vincent, Jr., M.D.,‡ Craig S. DeBruyn,§  
Shari A. Bleuer, B.S.,§ Papri Chatterjee, M.S.§

Ephedrine restores and/or protects uterine blood flow and fetal well-being in laboratory animals. In contrast,  $\alpha_1$ -adrenergic agonists worsen uterine blood flow and fetal condition. We previously demonstrated that magnesium sulfate ( $\text{MgSO}_4$ ) attenuates the detrimental effects of phenylephrine on uterine vascular resistance in gravid ewes. Therefore, we performed this study to determine whether ephedrine or phenylephrine better restores and protects uterine blood flow and fetal oxygenation during epidural anesthesia-induced hypotension in hypermagnesemic gravid ewes. Twelve chronically instrumented gravid ewes were each used for three experiments: 1) ephedrine, 2) phenylephrine, and 3) normal saline (NS)-control. For each experiment the protocol was as follows: 1) at time zero, intravenous infusion of  $\text{MgSO}_4$  was begun; 2) at 150 min a thoracic level of epidural anesthesia was achieved with 2% lidocaine; and 3) at 165 min, an intravenous infusion of ephedrine, phenylephrine, or NS was begun and continued through 195 min. Epidural anesthesia uniformly decreased maternal mean arterial blood pressure (MAP), heart rate, cardiac output, uterine blood flow, and fetal  $\text{P}_{\text{O}_2}$  in each of the three groups. Both ephedrine and phenylephrine restored maternal MAP to baseline, as expected from the experimental design. Ephedrine significantly increased cardiac output and uterine blood flow when compared with NS-control, but phenylephrine did not. Phenylephrine significantly increased uterine vascular resistance when compared with NS-control, but ephedrine did not. As a result, fetal pH and  $\text{P}_{\text{O}_2}$  were significantly greater during ephedrine infusion than during infusion of NS-control. Fetal pH was stable during ephedrine infusion, but it continued to decrease during phenylephrine infusion. Ephedrine, but not phenylephrine, significantly increased fetal  $\text{P}_{\text{O}_2}$  during treatment of hypotension. We conclude that, although ephedrine and phenylephrine provided similar restoration of maternal MAP, ephedrine was superior to phenylephrine in restoring uterine blood flow during epidural anesthesia-induced hypotension in hypermagnesemic gravid ewes. Furthermore, only ephedrine was clearly superior to NS-control in maintaining fetal pH and restoring fetal  $\text{P}_{\text{O}_2}$  during treatment of hypotension. (Key words: Anesthesia; obstetric. Anesthetic techniques: epidural. Anesthetics, local: lidocaine. Ions: magnesium. Pharmacology, tocolytic

agents: magnesium sulfate. Pregnancy: hypertension; preterm labor. Sympathetic nervous system,  $\alpha$ -adrenergic agonists: phenylephrine. Sympathomimetic agents: ephedrine.)

EPIDURAL ANESTHESIA-INDUCED hypotension in the parturient results in decreased placental perfusion, which, if sustained, may cause fetal hypoxia and lactic acidosis.<sup>1-4</sup> Intravenous hydration, left uterine displacement, and vasopressor administration are recommended to avoid or treat the maternal hypotension associated with sympathetic blockade. Ephedrine, a mixed  $\alpha$ - and  $\beta$ -adrenergic agonist, has been the vasopressor of choice because of its protective effect on uterine blood flow (UBF) in laboratory animals and its record of efficacy and safety in clinical practice.<sup>5-10</sup>

In contrast,  $\alpha_1$ -adrenergic agonists such as phenylephrine and methoxamine worsen UBF and fetal condition in pregnant animals.<sup>8,11,12</sup> However, Ramanathan and Grant<sup>13</sup> reported no significant differences in maternal hemodynamic measurements or neonatal blood gas and acid-base measurements in parturients whose epidural anesthesia-induced hypotension was corrected by either intravenous ephedrine or phenylephrine. As a result, some have suggested that it may be safe to give small doses of phenylephrine just sufficient to restore maternal blood pressure to baseline.

In an earlier study, we demonstrated that magnesium sulfate ( $\text{MgSO}_4$ ) infusion attenuated the detrimental effects of phenylephrine on uterine vascular resistance (UVR) in gravid ewes.<sup>14</sup> We hypothesized that  $\text{MgSO}_4$  infusion might blunt the usual increase in UVR during phenylephrine infusion for the treatment of epidural anesthesia-induced hypotension and make phenylephrine's effects on UBF more similar to the effects of ephedrine. The purpose of the present study was to determine whether ephedrine or phenylephrine infusion better restores and protects UBF and fetal oxygenation during epidural anesthesia-induced hypotension in hypermagnesemic gravid ewes.

### Materials and Methods

#### MATERNAL/FETAL INSTRUMENTATION AND POSTSURGICAL CARE

The protocol was approved by the University of Iowa Animal Care Committee. Mixed-breed ewes were ob-

\* Associate, Department of Obstetrics and Gynecology.

† Professor, Departments of Anesthesia and Obstetrics and Gynecology.

‡ Associate, Department of Anesthesia.

§ Research Assistant, Department of Anesthesia.

Received from the Departments of Anesthesia and Obstetrics and Gynecology, University of Iowa College of Medicine, Iowa City, Iowa. Accepted for publication February 28, 1992. Supported in part by National Institutes of Health grant GM 40917. Presented in part at the Annual Meeting of the Society for Obstetric Anesthesia and Perinatology, Boston, Massachusetts, May 23, 1991, and at the Annual Meeting of The American Society of Anesthesiologists, San Francisco, California, October 30, 1991.

Reprints will not be available.

Address correspondence to Dr. Chestnut: Department of Anesthesia, University of Iowa Hospitals and Clinics, Iowa City, Iowa 52242.

tained from a commercial breeder at approximately 118 days of timed gestation (term = 145 days). Each animal fasted for 36 h before surgery. At 120 days of gestation, induction of general anesthesia was accomplished with sodium thiopental (8–12 mg/kg). After tracheal intubation, anesthesia was maintained with 1–1.5% halothane in oxygen. Mechanical ventilation was maintained throughout surgery. Using sterile technique, a laparotomy and hysterotomy were performed, and catheters (polyethylene-90) were inserted into the fetal descending aorta *via* each femoral artery. Fenestrated high-pressure tubing (MX 566, Medex, Hilliard, OH) was secured to the fetal hind limb to monitor intraamniotic pressure. After the hysterotomy and laparotomy incisions were closed, a left paramedian incision was made. The left uterine artery was isolated *via* a retroperitoneal approach, and an electromagnetic flow probe (Dienco, Los Angeles, CA) was placed around the artery. Catheters (polyethylene-240) were then inserted into the maternal descending aorta and inferior vena cava *via* the left mammary artery and vein, respectively. All catheters were tunneled subcutaneously and exteriorized through a small incision in the left flank. Finally, an 8.5-Fr introducer (AK09800, Arrow, Reading, PA) was placed percutaneously into the right jugular vein.

A single-orifice, 19-G epidural catheter (Portex, Wilmington, MA) was inserted percutaneously into the epidural space at the lumbosacral junction, and the catheter was secured to the back. Eight milliliters 2% lidocaine was injected through the epidural catheter before the completion of surgery. After surgery the sensory level of anesthesia was determined.

After surgery, each animal was kept in an approved cage in a restricted area, fed a balanced diet, and allowed a recovery period of at least 4 days. Procaine and benzathine penicillin G (Dual-Pen®, Tech America, Kansas City, MO) 600,000 U or procaine penicillin G 300,000 U and dihydrostreptomycin 375 mg (Distrycillin® A.S., Solray Veterinary, Princeton, NJ) were given to the mother intramuscularly before surgery and daily for 3 days after surgery. Gentamicin 80 mg was given to the mother intravenously during surgery and on the day of each experiment, and gentamicin 40 mg was given *via* the amniotic catheter during surgery and on the day of each experiment. Postoperative analgesia was provided by administration of nalbuphine hydrochloride as needed.

#### EXPERIMENTAL MEASUREMENTS AND DATA ACQUISITION

Each experiment was performed with the animal standing, supported by a canvas sling, within an approved transport cart. The canvas sling allowed the animal to remain upright at all times.

Before the first experiment in each animal, a pulmonary artery catheter (93A-131H-7F or 93A-831H-7.5F, American Edwards Laboratories, Santa Ana, CA) was inserted through the jugular vein introducer. Sterility was maintained with an 80-cm sheath. Maternal arterial blood pressure, central venous pressure, pulmonary artery pressure, and fetal arterial blood pressure were measured continuously *via* disposable strain-gauge pressure transducers (46951-02, Abbott Critical Care Systems, North Chicago, IL) and transducer couplers (572-25 Coulbourn Instruments, Lehigh Valley, PA). Fetal pressures were corrected by subtraction of simultaneous intraamniotic pressure. Mean arterial blood pressure (MAP) was computed arithmetically. The maternal and fetal heart rates (HR) were computed from the arterial waveforms. UBF was measured continuously with a quantitative electromagnetic flowmeter (RF-2500, Dienco). Arterial and venous pressures, HR, and UBF were recorded at 10-s intervals using a computer-based system and customized data acquisition software (Alternatives Unlimited, Des Moines, IA).

Cardiac output measurements were made in triplicate with 10 ml iced saline and a thermodilution cardiac output computer (9520A, Edwards Laboratories). Maternal and fetal arterial blood gas and pH values were determined using an Instrumentation Laboratory (1302, Leighton, MA) blood gas analyzer. All values were corrected for temperature (39.5° C). Serum magnesium concentrations were measured using a spectrophotometric technique (Lancer Magnesium Rapid State Diagnostic Kit, Sherwood Medical, St. Louis, MO).

#### EXPERIMENTAL PROTOCOL

Two vasopressors were chosen for these experiments: phenylephrine (primarily an  $\alpha_1$ -adrenergic agonist) and ephedrine (a mixed  $\alpha$ - and  $\beta$ -adrenergic agonist). The phenylephrine solution was prepared as 0.02 mg/ml. The ephedrine solution was prepared as 1 mg/ml.

The experimental sequence included the following:

1. Forty minutes were allowed for the sheep to acclimate to the laboratory environment. Normal saline (NS) 250 ml was infused intravenously during the first 20 min of this time period.
2. Twenty minutes were allowed for baseline measurements. The total volume of crystalloid given was 50 ml.
3. At time zero, each animal received  $\text{MgSO}_4$  4 g intravenously over 5 min. The total volume of crystalloid given was 50 ml.
4. At 5 minutes, an intravenous infusion of  $\text{MgSO}_4$  was begun. Each animal received  $\text{MgSO}_4$  4 g/h intravenously for the duration of the experiment. The total rate of crystalloid infusion was 100 ml/h.

TABLE 1. Baseline Maternal and Fetal Hemodynamic, Blood Gas, and Acid-Base Measurements

|                                                                           | Ephedrine<br>(n = 12) | Phenylephrine<br>(n = 12) | Saline (Control)<br>(n = 12) |
|---------------------------------------------------------------------------|-----------------------|---------------------------|------------------------------|
| Maternal                                                                  |                       |                           |                              |
| Heart rate (beats/min)                                                    | 124 ± 4               | 120 ± 4                   | 124 ± 4                      |
| Mean arterial pressure (mmHg)                                             | 95 ± 3                | 93 ± 3                    | 95 ± 3                       |
| Cardiac output (l/min)                                                    | 11.3 ± 0.5            | 11.2 ± 0.5                | 12.1 ± 0.8                   |
| Systemic vascular resistance (dyne · s <sup>-1</sup> · cm <sup>-5</sup> ) | 650 ± 40              | 639 ± 38                  | 599 ± 42                     |
| Uterine blood flow (ml/min)                                               | 737 ± 154             | 873 ± 141                 | 865 ± 139                    |
| Uterine vascular resistance (dyne · s <sup>-1</sup> · cm <sup>-5</sup> )  | 13,856 ± 3,115        | 9,732 ± 1,700             | 9,828 ± 1,762                |
| pH                                                                        | 7.46 ± 0.01           | 7.46 ± 0.01               | 7.47 ± 0.01                  |
| P <sub>O<sub>2</sub></sub> (mmHg)                                         | 109 ± 3               | 112 ± 3                   | 111 ± 3                      |
| P <sub>CO<sub>2</sub></sub> (mmHg)                                        | 38 ± 1                | 38 ± 1                    | 36 ± 1                       |
| Fetal                                                                     |                       |                           |                              |
| Heart rate (beats/min)                                                    | 177 ± 5               | 170 ± 4                   | 173 ± 3                      |
| Mean arterial pressure (mmHg)                                             | 45 ± 2                | 45 ± 2                    | 46 ± 2                       |
| pH                                                                        | 7.32 ± 0.02           | 7.32 ± 0.02               | 7.32 ± 0.01                  |
| P <sub>O<sub>2</sub></sub> (mmHg)                                         | 18 ± 1                | 18 ± 1                    | 19 ± 1                       |
| P <sub>CO<sub>2</sub></sub> (mmHg)                                        | 51 ± 1                | 53 ± 1                    | 52 ± 1                       |

Values are reported as mean ± SEM.

- At 150 min, each animal received 10–16 ml 2% lidocaine, injected through the epidural catheter in two equal divided doses 1 min apart. The dose was determined according to the response to the lidocaine given on the day of surgery.
- Beginning at 155 min, the sensory level of anesthesia was determined with a curved hemostat at 5-min intervals. (We did not pinch the skin of the sheep. Rather, we used the hemostat in a manner similar to the way one would use a needle to assess the sensory level.<sup>15,16</sup>) Additional epidural lidocaine was injected as needed to achieve both a sensory level of T4–T6 and 25%–30% decrease in maternal MAP.
- At 165 min, an intravenous bolus of either phenylephrine 0.05 mg, ephedrine 2.5 mg, or NS-control solution 2.5 ml was given over 5 s, and a continuous intravenous infusion of ephedrine, phenylephrine or NS was begun at 0.05 mg/min, 2.5 mg/min, or 2.5 ml/min respectively. The ephedrine or phenylephrine infusion rate was adjusted to maintain maternal MAP at the baseline level. We did not make any adjustments in the rate of infusion of NS.
- At 195 min, the vasopressor or NS infusion was discontinued.
- At 212 min, the MgSO<sub>4</sub> infusion was discontinued.

We used 12 animals for 36 experiments, which were divided into three groups: 1) ephedrine (n = 12); 2) phenylephrine (n = 12); and 3) NS-control (n = 12). Each animal underwent all three experiments in random order. Only one experiment was performed per day, and each animal rested at least overnight before undergoing the next experiment.

Hemodynamic measurements were obtained over time throughout each experiment. Baseline measurements

were obtained over 20 min as an average of 120 observations. Other recorded measurements represent the mean of 12–18 observations made at 10-s intervals over a 2–3-min observation period. Maternal and fetal blood gas and acid–base measurements were obtained at baseline and at 145, 164, 180, 192, and 207 min. Maternal serum magnesium concentrations were obtained at baseline and at 145 and 207 min.

Baseline hemodynamic, blood gas and acid–base measurements are reported as mean ± SEM. Hemodynamic changes are presented as mean (± SEM) percent of baseline. Statistical analysis was performed by repeated-measures analysis of variance for overall differences between the experiment groups. *Post hoc* testing was performed using the Bonferroni correction where appropriate. *P* < 0.05 was considered significant.

### Results

The mean (± SEM) weight of the animals was 64 ± 2 kg. Baseline maternal and fetal hemodynamic, blood gas, and acid–base measurements were similar for the three groups: ephedrine, phenylephrine, and NS-control (table 1). Measurements remained similar among the three groups until 165 min, when the vasopressor or NS infusion was begun. Mean (± SEM) serum magnesium concentrations before MgSO<sub>4</sub> infusion and at 145 and 207 min are

TABLE 2. Serum Magnesium Concentrations (mg/dl)

|                  | Baseline  | 145 min   | 207 min   |
|------------------|-----------|-----------|-----------|
| Ephedrine        | 2.4 ± 0.1 | 6.1 ± 0.2 | 6.1 ± 0.2 |
| Phenylephrine    | 2.3 ± 0.1 | 6.0 ± 0.2 | 6.3 ± 0.2 |
| Saline (control) | 2.3 ± 0.1 | 5.9 ± 0.2 | 5.8 ± 0.6 |

Values are reported as mean ± SEM.

TABLE 3. Median Sensory Level and Total Lidocaine and Vasopressor Doses Given

|                  | Median Sensory Level |         | Total Dose of 2% Lidocaine (ml) | Total Dose of Vasopressor (mg) |
|------------------|----------------------|---------|---------------------------------|--------------------------------|
|                  | 165 min              | 180 min |                                 |                                |
| Ephedrine        | T5                   | T6      | 21 ± 2                          | 47 ± 7                         |
| Phenylephrine    | T5                   | T4      | 23 ± 3                          | 2.2 ± 0.3                      |
| Saline (control) | T5                   | T4      | 21 ± 3                          | —                              |

Lidocaine and vasopressor doses are expressed as mean ± SEM.

listed in table 2. (These concentrations were within the therapeutic range for tocolysis and seizure prophylaxis in pregnant women.<sup>17,18</sup>) The median sensory levels achieved, the mean volumes of lidocaine administered,

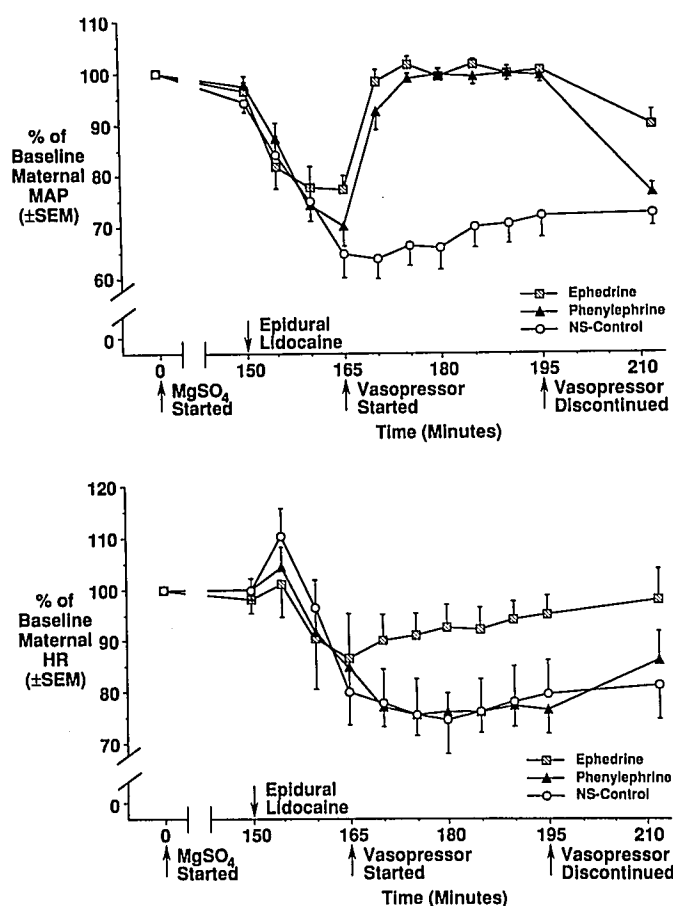

FIG. 1. *Top*: Maternal mean arterial pressure (MAP) over time for the ephedrine, phenylephrine, and normal saline (NS)-control groups. *Bottom*: Maternal heart rate (HR) over time for the ephedrine, phenylephrine, and NS-control groups. Each response is expressed as mean (±SEM) percent of the baseline. Standard error bars, if not shown, are included within the height of the symbols for each data point. Neither ephedrine nor phenylephrine significantly increased maternal HR when compared with NS-control.

and the mean total doses of vasopressor given to each group are listed in table 3.

Epidural anesthesia uniformly decreased maternal MAP, HR, cardiac output, UBF, and fetal  $P_{O_2}$  for each of the three groups (figs. 1–4). Epidural anesthesia significantly decreased systemic vascular resistance (SVR) in the phenylephrine and NS-control groups but not in the ephedrine group at 165 min. The differences between the three groups at 165 min were not significant. UVR did not change during epidural anesthesia alone in any group.

After 165 min, when the infusion of vasopressor or NS was begun, there were differences between the three

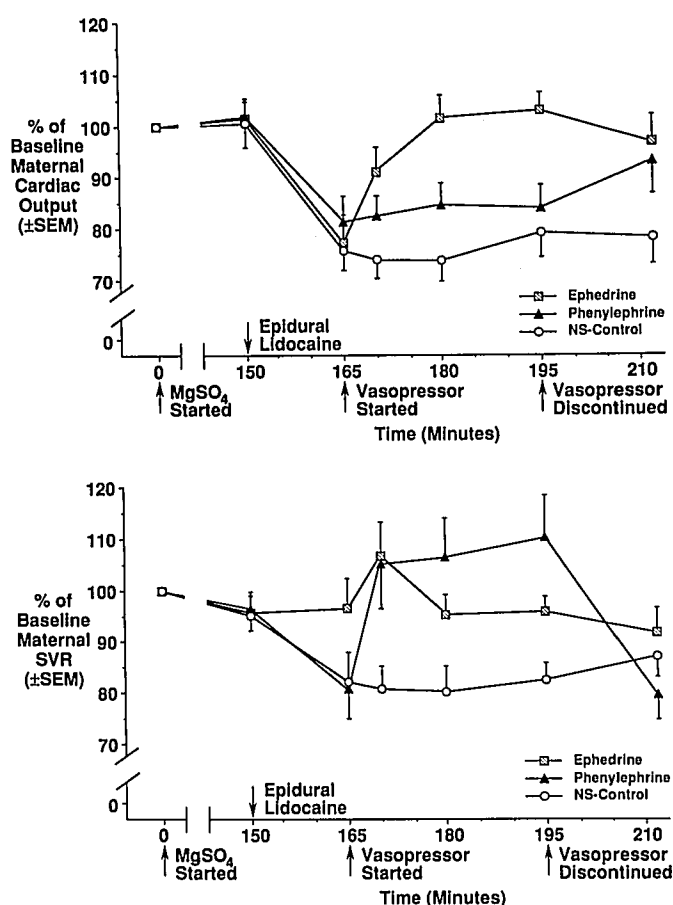

FIG. 2. *Top*: Maternal cardiac output over time for the ephedrine, phenylephrine, and normal saline (NS)-control groups. *Bottom*: Maternal systemic vascular resistance (SVR) over time for the ephedrine, phenylephrine, and NS-control groups. Each response is expressed as mean (±SEM) percent of the baseline. Standard error bars, if not shown, are included within the height of the symbols for each data point. Ephedrine significantly increased maternal cardiac output when compared with NS-control, but phenylephrine did not. Phenylephrine significantly increased SVR when compared with NS-control, but ephedrine did not. Phenylephrine significantly increased SVR when compared with ephedrine.

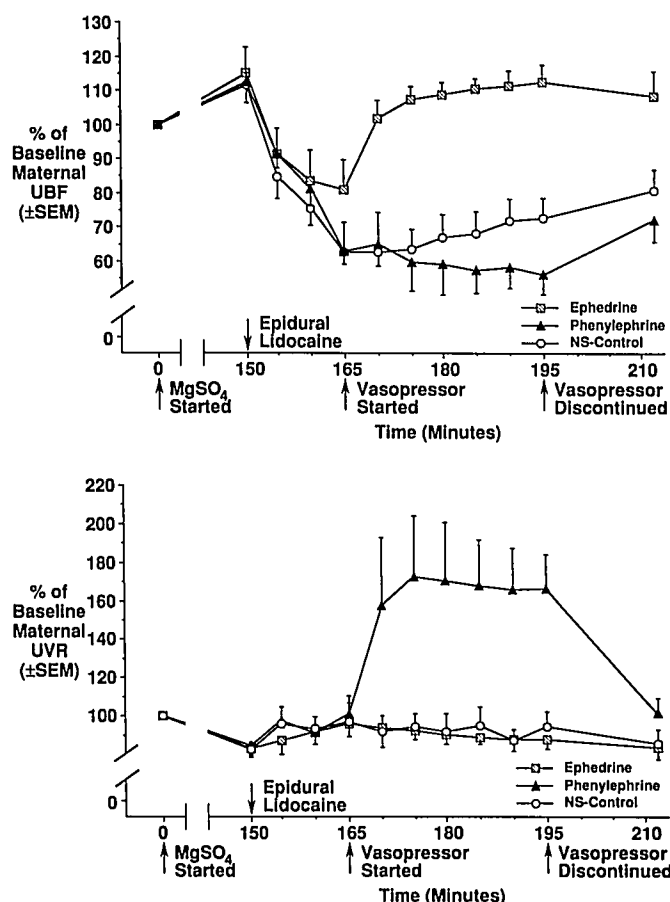

FIG. 3. *Top*: Maternal uterine blood flow (UBF) over time for the ephedrine, phenylephrine, and normal saline (NS)-control groups. *Bottom*: Maternal uterine vascular resistance over time for the ephedrine, phenylephrine, and NS-control groups. Each response is expressed as mean ( $\pm$ SEM) percent of the baseline. Standard error bars, if not shown, are included within the height of the symbols for each data point. Ephedrine significantly increased UBF when compared with NS-control, but phenylephrine did not. In addition, ephedrine significantly increased UBF when compared with phenylephrine. Phenylephrine increased UVR when compared with NS-control, but ephedrine did not.

groups. The presentation of the results will focus on the differences between 165 and 210 min.

Ephedrine and phenylephrine both returned maternal MAP to baseline (fig. 1), as would be expected from the experimental design. Neither ephedrine nor phenylephrine significantly increased maternal HR (fig. 1) when compared with NS-control.

Ephedrine significantly increased maternal cardiac output when compared with NS-control ( $P < 0.05$ ), but phenylephrine did not (fig. 2). Phenylephrine significantly increased SVR when compared with NS-control ( $P < 0.05$ ), but ephedrine did not (fig. 2). Phenylephrine

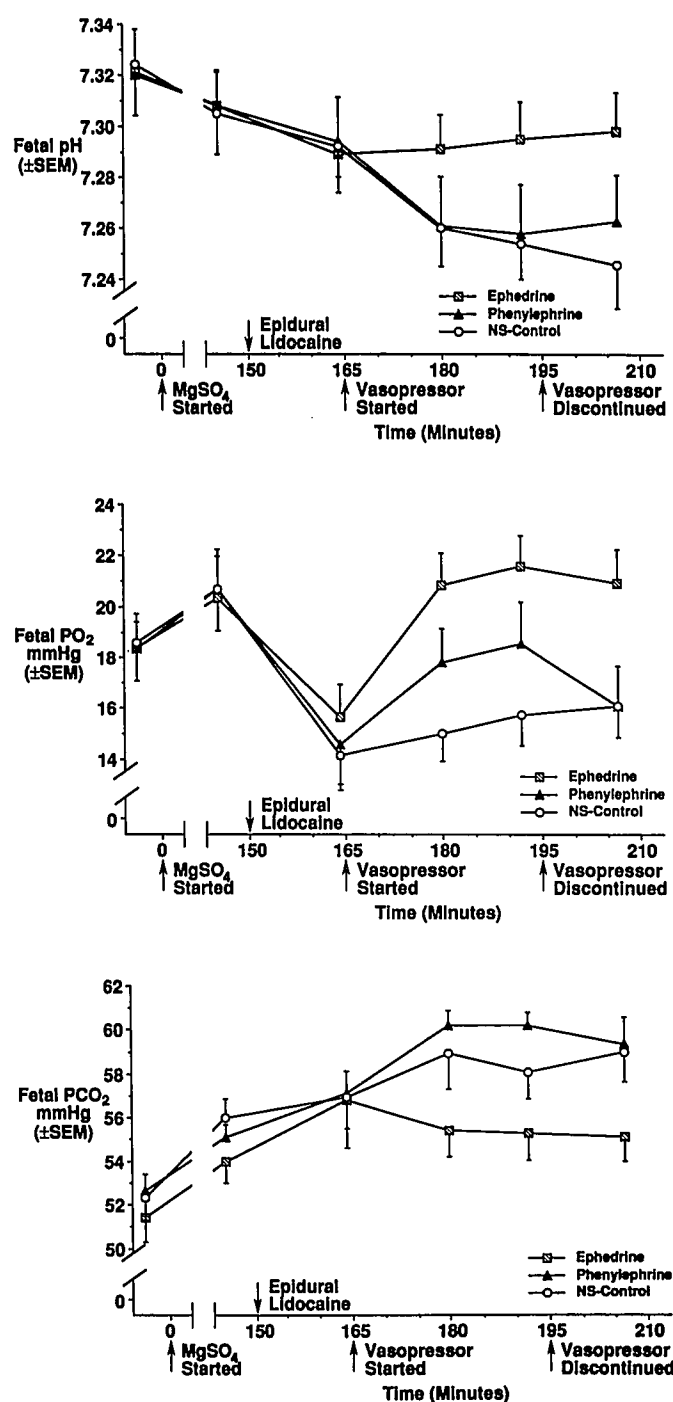

FIG. 4. *Top*: Fetal pH over time for the ephedrine, phenylephrine, and normal saline (NS)-control groups. *Middle*: Fetal P<sub>O2</sub> over time for the ephedrine, phenylephrine, and NS-control groups. *Bottom*: Fetal P<sub>CO2</sub> over time for the ephedrine, phenylephrine, and NS-control groups. Each response is expressed as mean ( $\pm$ SEM). Standard error bars, if not shown, are included within the height of the symbols for each data point. Fetal pH and P<sub>O2</sub> were significantly greater during ephedrine infusion than during infusion of NS-control. Fetal P<sub>CO2</sub> was significantly lower during infusion of ephedrine than during infusion of phenylephrine.

also significantly increased SVR when compared with ephedrine ( $P < 0.05$ ).

Ephedrine significantly increased UBF when compared with NS-control ( $P < 0.05$ ), but phenylephrine did not (fig. 3). The difference in UBF between the ephedrine and phenylephrine groups was also statistically significant ( $P < 0.05$ ). Phenylephrine increased UVR when compared with NS-control ( $P < 0.05$ ), but ephedrine did not (fig. 3).

Fetal  $pH$  and  $P_{O_2}$  were significantly greater during ephedrine infusion than during infusion of NS-control (fig. 4). Fetal  $pH$  was stable during ephedrine infusion, but it continued to decrease during phenylephrine infusion. Ephedrine, but not phenylephrine, significantly increased fetal  $P_{O_2}$  during treatment of hypotension. However, there was no significant difference between the ephedrine and phenylephrine groups in fetal  $pH$  and  $P_{O_2}$ . Fetal  $P_{CO_2}$  was significantly lower during infusion of ephedrine than during infusion of phenylephrine (fig. 4).

Fetal HR and MAP responses did not differ significantly either within or between groups (data not shown).

### Discussion

The primary focus of the present study was to evaluate the effects of two vasopressors: ephedrine and phenylephrine, in the treatment of epidural anesthesia-induced hypotension in hypermagnesemic gravid ewes. As expected, the onset of a high thoracic level of epidural anesthesia produced a marked decrease in maternal MAP, HR, cardiac output, UBF, and fetal  $P_{O_2}$  in all groups, whereas UVR was unchanged. Ephedrine and phenylephrine were then administered at rates just sufficient to restore maternal MAP to baseline. Despite similar restoration of maternal MAP, there were differences between the ephedrine and phenylephrine groups in UBF and UVR responses during vasopressor infusion. Furthermore, only ephedrine significantly increased fetal  $P_{O_2}$  and maintained fetal  $pH$ .

The pressor effects of ephedrine and phenylephrine result from two different mechanisms. Ephedrine stimulates both  $\alpha$ - and  $\beta$ -adrenergic receptors.<sup>19</sup> Its pressor effects are due primarily to cardiac stimulation, with a smaller contribution from arterial vasoconstriction.<sup>19</sup> In addition,  $\beta$ -adrenergic agonists such as ephedrine may increase cardiac output by decreasing venous capacitance and increasing venous return to the heart.<sup>20,21</sup> Earlier animal studies using intravenous ephedrine to treat hypotension during pregnancy demonstrated that it both restored maternal MAP and improved maternal UBF and fetal blood gas and acid-base measurements. James *et al.*<sup>5</sup> observed that ephedrine restored UBF during spinal anesthesia-induced hypotension in gravid ewes. Further,

Eng *et al.*<sup>6</sup> demonstrated that ephedrine resulted in either stabilization or improvement of fetal  $P_{O_2}$  toward control values during spinal anesthesia-induced hypotension in pregnant monkeys. Shnider *et al.*<sup>7</sup> noted that ephedrine caused improvement of fetal acidosis during spinal anesthesia in gravid ewes. In contrast, these and other animal studies noted that  $\alpha$ -adrenergic agonists had a deleterious effect on UBF.<sup>12,22,23</sup> Thus, ephedrine has been the vasopressor of choice in obstetric anesthesia practice.

Phenylephrine is primarily an  $\alpha_1$ -adrenergic receptor agonist with minimal  $\beta$ -adrenergic receptor effects.<sup>19</sup> Its pressor effects are due to vasoconstriction and increased peripheral vascular resistance. The pressor response to phenylephrine is accompanied by a reflex bradycardia, which results in decreased cardiac output. Magness and Rosenfeld<sup>22</sup> showed that phenylephrine caused a dose-dependent increase in maternal MAP, SVR, and UVR with concomitant decreases in maternal HR, cardiac output, and UBF in gravid ewes. The increase in UVR exceeded that of SVR.<sup>22</sup> The pressor response to phenylephrine was attenuated during pregnancy.<sup>22</sup> The same authors<sup>23</sup> later demonstrated that the SVR response to phenylephrine was not changed during pregnancy, but the decrease in maternal HR and cardiac output was greater in pregnant animals than in nonpregnant animals.<sup>23</sup> Greiss and Crandell<sup>12</sup> showed that phenylephrine restored maternal MAP during spinal anesthesia without causing any significant improvement in UBF in gravid ewes. In some cases, phenylephrine administration had to be discontinued because of the risk of fetal demise secondary to worsened UBF.<sup>12</sup> Thus, animal studies have consistently demonstrated decreased UBF following phenylephrine administration during pregnancy.

Earlier studies<sup>14,16,24</sup> from this laboratory demonstrated that  $MgSO_4$  infusion can change both maternal and fetal responses to hypotension and vasopressor administration. Chestnut *et al.*<sup>24</sup> observed that  $MgSO_4$  worsened maternal hypotension during hemorrhage in gravid ewes. Vincent *et al.*<sup>16</sup> reported that  $MgSO_4$  decreased maternal MAP but not UBF or fetal  $P_{O_2}$  during epidural anesthesia in gravid ewes. Sipes *et al.*<sup>14</sup> later observed that  $MgSO_4$  did not affect the action of phenylephrine on SVR but, rather, attenuated the increase in UVR and the decrease in UBF in response to phenylephrine infusion. These results suggested that hypermagnesemia might alter the uterine vascular response to ephedrine or phenylephrine during epidural anesthesia-induced hypotension.

The present study augments previous studies of vasopressor administration in pregnant animals by observing responses to ephedrine or phenylephrine during epidural anesthesia-induced hypotension in hypermagnesemic gravid ewes. Under these conditions, ephedrine restored UBF and did not alter UVR, whereas phenylephrine did not

improve UBF and markedly increased UVR. Thus, our results are similar to those of previous studies that did not administer  $\text{MgSO}_4$ .<sup>5-7,12,22,23</sup> One potential explanation for this finding may be that  $\text{MgSO}_4$  affected all three groups similarly. It is also possible that the effect of  $\text{MgSO}_4$  on the uterine vascular response to phenylephrine was small, so that relative differences between ephedrine and phenylephrine were preserved. It is important to note that even in the presence of hypermagnesemia, which may have provided partial protection of UBF during phenylephrine infusion, phenylephrine increased UVR and did not maintain fetal pH during epidural anesthesia-induced hypotension.

We acknowledge that vasopressor administration may have changed the volume of distribution for magnesium and resulted in acute changes in serum magnesium concentrations.<sup>25</sup> Magnesium concentrations were similar at 145 and 207 min (table 2), but we did not measure serum magnesium concentrations during vasopressor administration. If vasopressor infusion caused acute, transient changes in magnesium concentrations in the present study, one could expect similar changes to occur in clinical practice. Thus, such changes in magnesium concentration, if they do occur, would not change the conclusions or application of the present study.

We also acknowledge the apparent conflict between the present study and our earlier study.<sup>16</sup> In the earlier study,<sup>16</sup>  $\text{MgSO}_4$  decreased maternal MAP but not UBF or fetal  $\text{P}_{\text{O}_2}$  during epidural anesthesia. Differences in the methods help explain the apparent difference in results. First, in the earlier study, each animal received 500 ml of NS intravenously immediately before epidural anesthesia. The bolus infusion of NS increased maternal cardiac output, and this helped to protect both cardiac output and UBF during epidural anesthesia. In the present study, animals did not receive a bolus of crystalloid immediately before epidural anesthesia. Second, in the earlier study, animals in the  $\text{MgSO}_4$  group had a median sensory level of T10 and a maximum decrease in maternal MAP of  $18 \pm 3\%$  below baseline. In the present study, we deliberately sought to achieve a higher sensory level and a greater decrease in maternal MAP during epidural anesthesia. The lack of volume expansion before anesthesia and the more extensive sympathetic blockade during anesthesia likely were responsible for the greater decreases in maternal MAP, cardiac output, and UBF in all three groups in the present study.

The results of the present study have several important limitations when applied to the use of ephedrine and phenylephrine in obstetric practice. First, there are known  $\alpha$ - and  $\beta$ -adrenergic receptor distribution differences among species and resultant differences in vascular responses to  $\alpha$ - and  $\beta$ -adrenergic agonists. Second, whereas

the pregnant woman is nearly supine during labor and operative delivery, the animals were standing. Third, in clinical practice these vasopressors are given as intermittent boluses, whereas in the present study ephedrine and phenylephrine were continuously infused over 30 min in order to just restore maternal MAP to baseline. Fourth, in clinical practice the anesthesiologist gives both vasopressor and crystalloid to restore maternal MAP, whereas in the present study we relied on vasopressor alone. These differences in management could change the magnitude of the systemic and uterine vascular responses observed. However, there is no evidence that we gave excessive doses of either ephedrine or phenylephrine, and we speculate that bolus administration of drug might have exaggerated the difference between drugs in uterine vascular response.

Recently, some have suggested that a small dose of phenylephrine, just sufficient to restore maternal blood pressure to baseline, might be as safe as ephedrine for the treatment of hypotension during regional anesthesia in pregnant women. Ramanathan and Grant<sup>13</sup> reported no significant difference in maternal blood pressure, stroke volume, and end-diastolic volume or neonatal Apgar scores, blood gas measurements, and acid-base measurements in pregnant women whose epidural anesthesia-induced hypotension was corrected by either intravenous ephedrine or phenylephrine. Similarly, Moran *et al.*<sup>26</sup> demonstrated no difference in maternal acid-base or neonatal blood gas and acid-base measurements in women who received phenylephrine for treatment of spinal anesthesia-induced hypotension. Patients enrolled in these studies were healthy women undergoing elective repeat cesarean section. Undoubtedly, most of these women had a large margin of maternal and fetal reserve. Neither the present study nor earlier studies<sup>13,26</sup> evaluated the effects of ephedrine or phenylephrine on the compromised fetus. However, we note that fetuses undergoing labor or compensating for high-risk maternal conditions such as pregnancy-induced hypertension may be unable to tolerate the effects of additional decreases in uteroplacental perfusion. Thus, optimization of uterine perfusion during maternal hypotension and vasopressor administration may be important in such fetuses. Nonetheless, we acknowledge that there are specific situations when maternal conditions may dictate the administration of an  $\alpha$ -adrenergic agonist rather than ephedrine for treatment of hypotension.

We conclude that, although ephedrine and phenylephrine provided similar restoration of maternal MAP, ephedrine was superior to phenylephrine in restoring UBF during epidural anesthesia-induced hypotension in hypermagnesemic gravid ewes. Furthermore, only ephedrine was clearly superior to NS-control in maintaining fetal pH and increasing fetal  $\text{P}_{\text{O}_2}$  during treatment

of hypotension. If applicable to humans, the present study suggests that ephedrine is preferred to phenylephrine for treatment of hypotension during regional anesthesia in the presence of hypermagnesemia.

### References

1. Antoine C, Young BK: Fetal lactic acidosis with epidural anesthesia. *Am J Obstet Gynecol* 142:55-59, 1982
2. Greiss FC Jr: Pressure-flow relationship in the gravid uterine vascular bed. *Am J Obstet Gynecol* 96:41-47, 1966.
3. Jouppila R, Jouppila P, Kuikka J, Hollmén A: Placental blood flow during cesarean section under lumbar extradural anaesthesia. *Br J Anaesth* 50:275-279, 1978
4. Corke BC, Datta S, Ostheimer GW: Hypotension during spinal anaesthesia for caesarean section: Its influence on infant outcome. *Anaesthesia* 37:658-662, 1982
5. James FM III, Greiss FC, Kemp RA: An evaluation of vasopressor therapy for maternal hypotension during spinal anesthesia. *ANESTHESIOLOGY* 33:25-34, 1970
6. Eng M, Berges PU, Parer JT, Bonica JJ, Ueland K. Spinal anesthesia and ephedrine in pregnant monkeys. *Am J Obstet Gynecol* 115:1095-1099, 1973
7. Shnider SM, deLorimier AA, Holl JW, Chapler FK, Morishima HO: Vasopressors in obstetrics: I. Correction of fetal acidosis with ephedrine during spinal hypotension. *Am J Obstet Gynecol* 102:911-919, 1968
8. Eng M, Berges PU, Ueland K, Bonica JJ, Parer JT: The effects of methoxamine and ephedrine in normotensive pregnant primates. *ANESTHESIOLOGY* 35:354-360, 1971
9. Ralston DH, Shnider SM, deLorimier AA: Effects of equipotent ephedrine, metaraminol, mephentermine, and methoxamine on uterine blood flow in the pregnant ewe. *ANESTHESIOLOGY* 40:354-370, 1974
10. Hollmen AI, Jouppila R, Albright GA, Jouppila P, Vierola H, Koivula A: Intervillous blood flow during cesarean section with prophylactic ephedrine and epidural anesthesia. *Acta Anaesthesiol Scand* 28:396-400, 1984
11. Shnider SM, deLorimier AA, Asling JH, Morishima HO: Vasopressors in obstetrics: II. Fetal hazards of methoxamine administration during obstetric spinal anesthesia. *Am J Obstet Gynecol* 106:680-686, 1970
12. Greiss FC, Crandell DL: Therapy for hypotension induced by spinal anesthesia during pregnancy: Observations on gravid ewes. *JAMA* 191:793-796, 1965
13. Ramanathan S, Grant GJ: Vasopressor therapy for hypotension due to epidural anesthesia for cesarean section. *Acta Anaesthesiol Scand* 32:559-565, 1988
14. Sipes SL, Chestnut DH, Vincent RD Jr, Weiner CP, Thompson CS, Chatterjee P: Does magnesium sulfate alter the maternal cardiovascular response to vasopressor agents in gravid ewes? *ANESTHESIOLOGY* 75:1010-1018, 1991
15. Chestnut DH, Pollack KL, Thompson CS, DeBruyn CS, Weiner CP: Does ritodrine worsen maternal hypotension during epidural anesthesia in gravid ewes? *ANESTHESIOLOGY* 72:315-321, 1990
16. Vincent RD Jr, Chestnut DH, Sipes SL, Weiner CP, DeBruyn CS, Bleuer SA: Magnesium sulfate decreases maternal blood pressure but not uterine blood flow during epidural anesthesia in gravid ewes. *ANESTHESIOLOGY* 74:77-82, 1991
17. Elliott JP: Magnesium sulfate as a tocolytic agent. *Am J Obstet Gynecol* 147:277-84, 1983
18. Hollander DI, Nagey DA, Pupkin MJ: Magnesium sulfate and ritodrine hydrochloride: A randomized comparison. *Am J Obstet Gynecol* 156:631-637, 1987
19. Weiner N: Norepinephrine, epinephrine, and the sympathomimetic amines, *The Pharmacologic Basis of Therapeutics*. 7th edition. Edited by Gilman AG, Goodman LS, Gilman A. New York, Macmillan Publishing Co., Inc., 1980, pp 170-171
20. Imai Y, Keisuke S, Taira N: Role of the peripheral vasculature in changes in venous return caused by isoproterenol, norepinephrine, and methoxamine in anesthetized dogs. *Circ Res* 43:553-561, 1978
21. Bennett TD, Wyss CR, Scher AM: Changes in vascular capacity in awake dogs in response to carotid sinus occlusion and administration of catecholamines. *Circ Res* 55:440-453, 1984
22. Magness RR, Rosenfeld CR: Systemic and uterine responses to  $\alpha$ -adrenergic stimulation in pregnant and nonpregnant ewes. *Am J Obstet Gynecol* 155:897-904, 1986
23. Magness RR, Rosenfeld CR: Mechanisms for attenuated pressor responses to  $\alpha$ -agonists in ovine pregnancy. *Am J Obstet Gynecol* 159:252-261, 1988
24. Chestnut DH, Thompson CS, McLaughlin GL, Weiner CP: Does the intravenous infusion of ritodrine or magnesium sulfate alter the hemodynamic response to hemorrhage in gravid ewes? *Am J Obstet Gynecol* 159:1467-1473, 1988
25. Benowitz N, Forsyth RP, Melimon KL, Rowland M: Lidocaine disposition kinetics in monkey and man: II. Effects of hemorrhage and sympathomimetic drug administration. *Clin Pharmacol Ther* 16:99-109, 1974
26. Moran DH, Perillo M, Bader AM, Datta S: Phenylephrine in treating maternal hypotension secondary to spinal anesthesia (abstract). *ANESTHESIOLOGY* 71:A857, 1989
